# Supplementary material
Source: PubMed Central journal article supplement (PMC2773969)
Supplement: 0906132106_0906132106SI.pdf [file 0906132106_0906132106SI.pdf]

# Supporting Information

Koutmos et al. 10.1073/pnas.0906132106

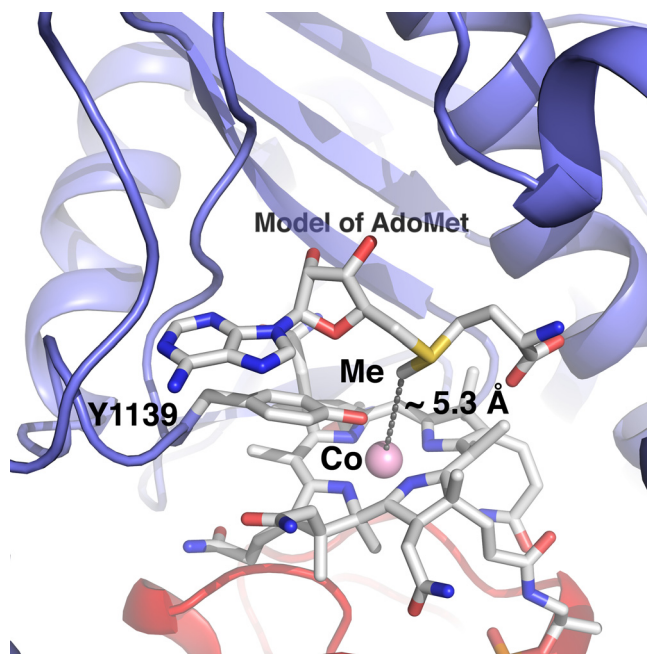

Fig. S1. AdoMet was modeled in the AdoMet/AdoHcy pocket on the basis of the position of the AdoHcy in the Co(II)Cbl<sub>5,5</sub>MeH<sup>CT</sup> structure.

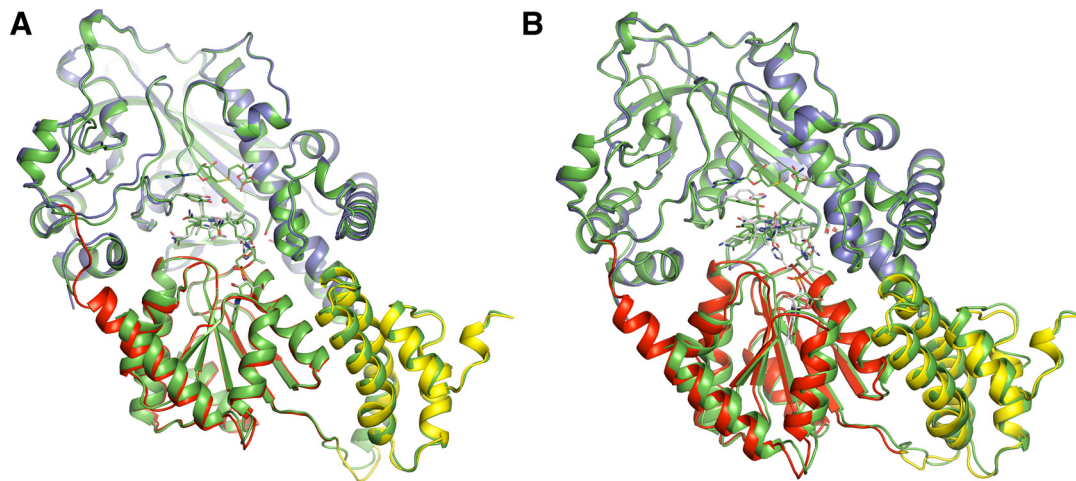

**Fig. S2.** Superposition of the Co(II)Cbl  $s$ - $s$ MeH<sup>CT</sup> shown in green with (A) MeCo(III)Cbl  $s$ - $s$ MeH<sup>CT</sup> (PDB ID 3BUL) [Datta S, Koutmos M, Patridge KA, Ludwig ML, Matthews RG (2008) A disulfide-stabilized conformer of methionine synthase reveals an unexpected role for the histidine ligand of the cobalamin cofactor. *Proc Natl Acad Sci USA* 105:4115–4120] colored as in Fig. 2, and with (B) AquoCo(III)Cbl  $s$ - $s$ MeH<sup>CT</sup>, colored as in Fig. 2. The superpositions are based on selected residues from the  $\beta$ -strands of the AdoMet domain.

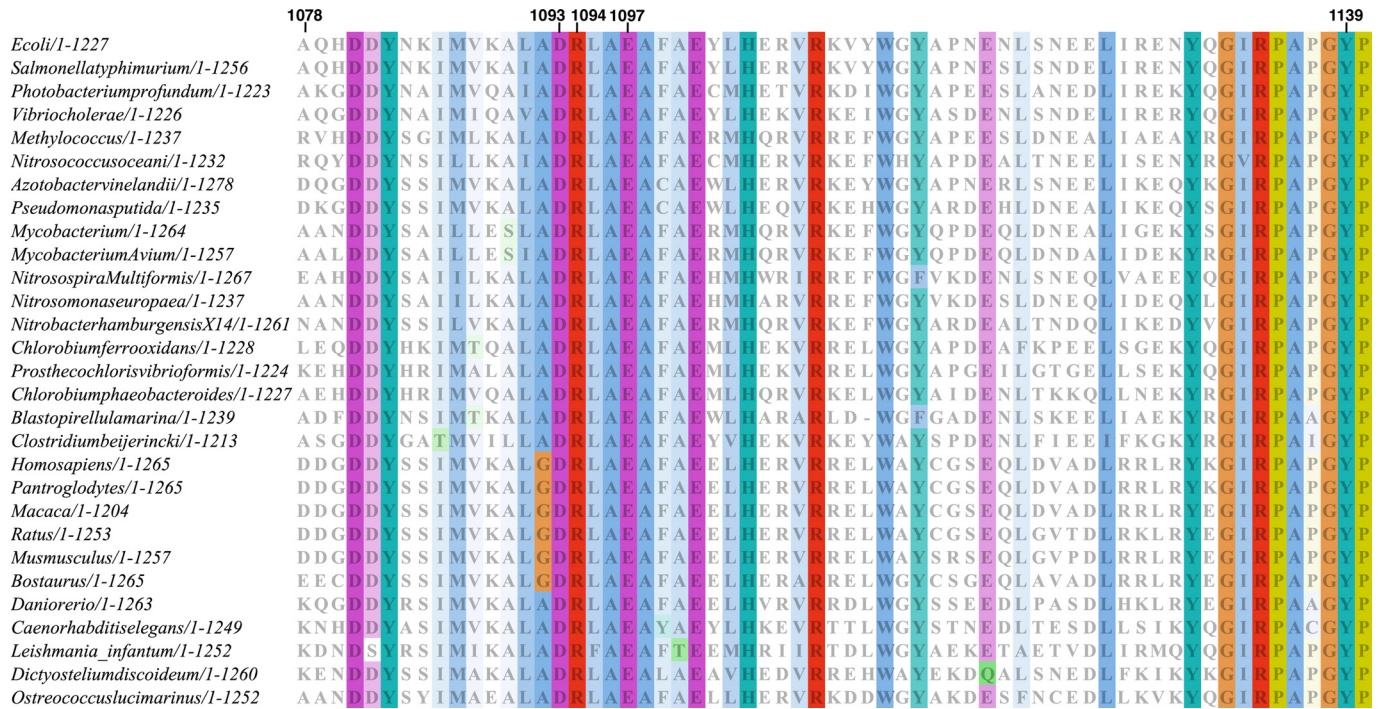

**Fig. S3.** Sequence alignment of MetH enzymes from various sources. Invariant and conserved residues are highlighted according to the clustalx coloring scheme (1). Invariant residues D1093, E1097, and Y1139 in *E. coli* are indicated in the figure. These alignments are selected from a multiple alignment performed in CLUSTALW (2) using MetH sequences obtained from the NCBI database. 1. Chenna R, et al. (2003) Multiple sequence alignment with the Clustal series of programs. *Nucleic Acids Res* 31:3497–3500. 2. Thompson JD, Higgins DG, Gibson TJ (1994) CLUSTAL W: Improving the sensitivity of progressive multiple sequence alignment through sequence weighting, position-specific gap penalties and weight matrix choice. *Nucleic Acids Res* 22:4673–4680.

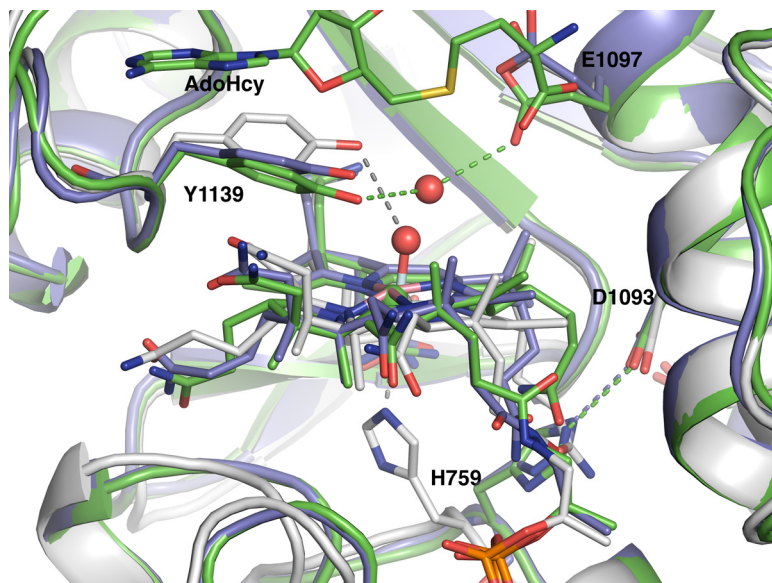

**Fig. S4.** Overlay of the Co(II)Cbl  $s_5$ MeH<sup>CT</sup> structure, in green, with the AquoCo(III)Cbl  $s_5$ MeH<sup>CT</sup> structure, in light gray, and with the MeCo(III)Cbl  $s_5$ MeH<sup>CT</sup> structure (PDB ID 3BUL) [Datta S, Koutmos M, Patridge KA, Ludwig ML, Matthews RG (2008) A disulfide-stabilized conformer of methionine synthase reveals an unexpected role for the histidine ligand of the cobalamin cofactor. *Proc Natl Acad Sci U S A* 105:4115–4120], in blue. Residues from the  $\beta$ -strands of the AdoMet domain were used for the superposition. Of note are (i) the 2 different positions of H759, a “His-on” position in  $s_5$ MeH<sup>CT</sup>/AquoCo(III)Cbl and a “His-off” position in the other 2 structures in which H759 hydrogen bonds to D1093; (ii) the relative movement and different positions of Y1139 in all 3 structures; and (iii) the movement of the cobalamin domain but not the cobalamin cofactor.

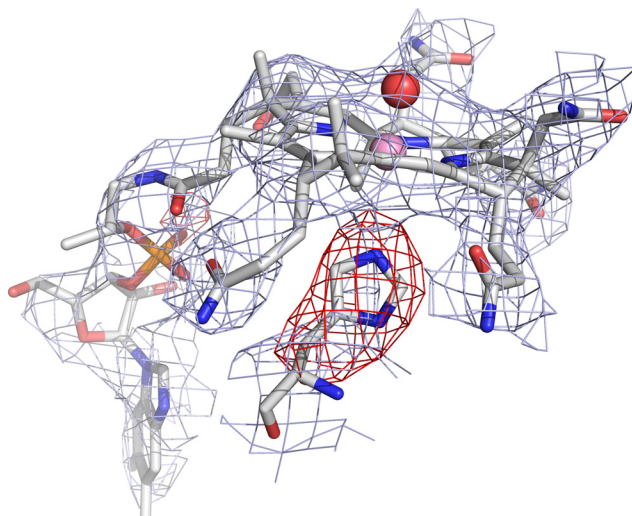

**Fig. S5.** Electron density and ball and stick model of the AquoCo(III)Cbl cofactor. The blue (at  $1\sigma$ ) and red (at  $3\sigma$ ) contours represent electron density from a weighted  $2F_{\text{obs}}-F_{\text{calc}}$  and  $F_{\text{obs}}-F_{\text{calc}}$  omit map, respectively. His-759 was omitted from the model before the calculation of the composite omit map.

**Table S1. Data collection and refinement statistics<sup>a</sup>**

| Protein                                      | AquoCob(III) <sub>5-5</sub> MetH <sup>CT</sup>                                             | Cob(II) <sub>5-5</sub> MetH <sup>CT</sup> + AdoHcy                                         |
|----------------------------------------------|--------------------------------------------------------------------------------------------|--------------------------------------------------------------------------------------------|
| Diffraction data                             |                                                                                            |                                                                                            |
| Space group                                  | P4 <sub>3</sub> 2 <sub>1</sub> 2                                                           | P4 <sub>3</sub> 2 <sub>1</sub> 2                                                           |
| Unit cell parameters                         | <i>a</i> = 107.5<br><i>b</i> = 107.5<br><i>c</i> = 143.8<br>$\alpha = \beta = \gamma = 90$ | <i>a</i> = 107.0<br><i>b</i> = 107.0<br><i>c</i> = 141.2<br>$\alpha = \beta = \gamma = 90$ |
| Data range (Å)                               | 50–3.25                                                                                    | 50–2.70                                                                                    |
| Measured reflections                         | 131,794                                                                                    | 519,512                                                                                    |
| Unique reflections                           | 13,886                                                                                     | 23,160                                                                                     |
| Average redundancy                           | 9.5                                                                                        | 22.4                                                                                       |
| Completeness (%) <sup>a</sup>                | 99.9 (99.9)                                                                                | 100.0 (99.9)                                                                               |
| <i>I</i> / $\sigma$ <sup>a</sup>             | 19.44 (3.17)                                                                               | 27.20 (5.82)                                                                               |
| <i>R</i> <sub>sym</sub> (%) <sup>a,b</sup>   | 8.8 (77.8)                                                                                 | 8.5 (62.2)                                                                                 |
| Refinement                                   |                                                                                            |                                                                                            |
| Number of reflections                        | 13,846                                                                                     | 23,159                                                                                     |
| Working set                                  | 13,153                                                                                     | 22,029                                                                                     |
| Test set                                     | 693                                                                                        | 1,130                                                                                      |
| <i>R</i> <sub>cryst</sub> <sup>c</sup>       | 28.2                                                                                       | 28.2                                                                                       |
| <i>R</i> <sub>free</sub> <sup>d</sup>        | 32.1                                                                                       | 30.0                                                                                       |
| No. protein atoms                            | 4,572                                                                                      | 4,546                                                                                      |
| No. water molecules                          | 22                                                                                         | 26                                                                                         |
| RMSD bond lengths (Å) <sup>e</sup>           | 0.009                                                                                      | 0.009                                                                                      |
| RMSD bond angles (deg.) <sup>e</sup>         | 1.10                                                                                       | 1.40                                                                                       |
| Average protein B-factor (Å <sup>2</sup> )   | 111                                                                                        | 74                                                                                         |
| Average cobalamin B-factor (Å <sup>2</sup> ) | 113                                                                                        | 78                                                                                         |
| Average AdoHcy B-factor (Å <sup>2</sup> )    | -                                                                                          | 98                                                                                         |

<sup>a</sup>Statistics for the highest resolution shell are enclosed in parentheses.

<sup>b</sup> $R_{\text{sym}} = \sum |I - \langle I \rangle| / \sum I$ , where *I* = observed intensity, and  $\langle I \rangle$  = average intensity obtained from multiple measurements.

<sup>c</sup> $R_{\text{cryst}} = \sum ||F_{\text{obs}}| - |F_{\text{calc}}|| / \sum |F_{\text{obs}}|$ , where *F*<sub>calc</sub> and *F*<sub>obs</sub> are the calculated and observed structure factor amplitudes, respectively.

<sup>d</sup>*R*<sub>free</sub>, *R*-factor based on 5% of the data excluded from refinement.

<sup>e</sup>RMSD, root mean square deviation.
